# Supplementary material for: A DNA microarray for the authentication of giant tiger prawn (Penaeus monodon) and whiteleg shrimp (Penaeus (Litopenaeus) vannamei): a proof-of-principle
Source: PubMed Central journal article supplement (PMC8318932; doi:10.1007/s00216-021-03440-2), 2021-06-11
Supplement: 216_2021_3440_MOESM1_ESM.pdf [file 216_2021_3440_MOESM1_ESM.pdf]

## Supplementary Information

### A DNA microarray for the authentication of giant tiger prawn (*Penaeus monodon*) and whiteleg shrimp (*Penaeus (Litopenaeus) vannamei*): a proof-of-principle

Analytical and Bioanalytical Chemistry

Kristina Kappel, Joanna Fafińska, Markus Fischer, Jan Fritsche

Corresponding author: Kristina Kappel, Max Rubner-Institut, Department of Safety and Quality of Milk and Fish Products, Kiel, Germany;

[kristina.kappel@mri.bund.de](mailto:kristina.kappel@mri.bund.de)

**Table S1** In this file, the BLAST and BOLD results from database queries with sequences obtained from the crustacean specimens used in this study are compiled

| Species                               | Specimen             | Original sample designation                          | Gene marker (and database)                           | First GenBank hit (sorted by Maximum Percent Identity/sorted by Maximum Score) <sup>a</sup> /First BOLD hit | GenBank identity of first hit (sorted by Maximum Percent Identity/sorted by Maximum Score) <sup>a</sup> / BOLD similarity of first hit |                                 |                      |
|---------------------------------------|----------------------|------------------------------------------------------|------------------------------------------------------|-------------------------------------------------------------------------------------------------------------|----------------------------------------------------------------------------------------------------------------------------------------|---------------------------------|----------------------|
| <b>Penaeidae</b>                      |                      |                                                      |                                                      |                                                                                                             |                                                                                                                                        |                                 |                      |
| <i>Penaeus (Litopenaeus) vannamei</i> | <i>P. vannamei</i> 1 | Pvan01a                                              | 16S rDNA (long)                                      | Litopenaeus vannamei (KT596762)                                                                             | 100% (519 nt/519 nt)                                                                                                                   |                                 |                      |
|                                       |                      |                                                      | COI GenBank                                          | Penaeus vannamei (MH194528)                                                                                 | 100% (658 nt/658 nt)                                                                                                                   |                                 |                      |
|                                       |                      |                                                      | COI BOLD                                             | Penaeus vannamei;<br>Litopenaeus vannamei                                                                   | 100%                                                                                                                                   |                                 |                      |
|                                       | <i>P. vannamei</i> 2 | Pvan01b                                              | 16S rDNA (long)                                      | Litopenaeus vannamei (KT596762)                                                                             | 100% (519 nt/519 nt)                                                                                                                   |                                 |                      |
|                                       | <i>P. vannamei</i> 3 | Pvan02a                                              | 16S rDNA (long)                                      | Litopenaeus vannamei (KT596762)                                                                             | 100% (519 nt/519 nt)                                                                                                                   |                                 |                      |
|                                       | <i>P. vannamei</i> 4 | Pvan02b                                              | 16S rDNA (long)                                      | Litopenaeus vannamei (KT596762)                                                                             | 100% (519 nt/519 nt)                                                                                                                   |                                 |                      |
|                                       | <i>P. vannamei</i> 5 | Pvan03a                                              | 16S rDNA (long)                                      | Litopenaeus vannamei (KT596762)                                                                             | 100% (519 nt/519 nt)                                                                                                                   |                                 |                      |
|                                       | <i>P. vannamei</i> 6 | Pvan03b                                              | 16S rDNA (long)                                      | Litopenaeus vannamei (KT596762)                                                                             | 100% (519 nt/519 nt)                                                                                                                   |                                 |                      |
| <i>Penaeus monodon</i>                | <i>P. vannamei</i> 7 | Pvan04a                                              | 16S rDNA (long)                                      | Litopenaeus vannamei (KT596762)                                                                             | 100% (519 nt/519 nt)                                                                                                                   |                                 |                      |
|                                       |                      |                                                      | <i>P. vannamei</i> 8                                 | Pvan04b                                                                                                     | 16S rDNA (long)                                                                                                                        | Litopenaeus vannamei (KT596762) | 100% (519 nt/519 nt) |
|                                       |                      |                                                      | <i>P. monodon</i> 1                                  | Pmon01a                                                                                                     | 16S rDNA (long)                                                                                                                        | Penaeus monodon (MF563558)      | 100% (519 nt/519 nt) |
|                                       | COI GenBank          | Penaeus monodon (LC121767)/<br>P. monodon (MK430656) |                                                      |                                                                                                             | 100% (469/469)/<br>99.85% (657 nt/658 nt)                                                                                              |                                 |                      |
|                                       | COI BOLD             | Penaeus monodon                                      |                                                      |                                                                                                             | 99.85%                                                                                                                                 |                                 |                      |
|                                       | <i>P. monodon</i> 2  | Pmon01b                                              | 16S rDNA (long)                                      | Penaeus monodon (MF563558)                                                                                  | 100% (519 nt/519 nt)                                                                                                                   |                                 |                      |
|                                       | <i>P. monodon</i> 3  | Pmon02a                                              | 16S rDNA (long)                                      | Penaeus monodon (EU105473)/<br>P. monodon (AF217843)                                                        | 100% (470 nt/470 nt)/<br>99.81% (519 nt/520 nt)                                                                                        |                                 |                      |
|                                       |                      |                                                      | COI GenBank                                          | Penaeus mododon (MK430659)                                                                                  | 100% (658 nt/658 nt)                                                                                                                   |                                 |                      |
| COI BOLD                              |                      |                                                      | Penaeus monodon                                      | 100%                                                                                                        |                                                                                                                                        |                                 |                      |
| <i>P. monodon</i> 4                   | Pmon02b              | 16S rDNA (long)                                      | Penaeus monodon (EU105473)/<br>P. monodon (AF217843) | 100% (470 nt/470 nt)/<br>99.81% (519 nt/520 nt)                                                             |                                                                                                                                        |                                 |                      |

continued

| Species                                    | Specimen              | Original sample designation | Gene marker (and database)                                                                  | First GenBank hit (sorted by Maximum Percent Identity/sorted by Maximum Score) <sup>a</sup> /First BOLD hit | GenBank identity of first hit (sorted by Maximum Percent Identity/sorted by Maximum Score) <sup>a</sup> / BOLD similarity of first hit |
|--------------------------------------------|-----------------------|-----------------------------|---------------------------------------------------------------------------------------------|-------------------------------------------------------------------------------------------------------------|----------------------------------------------------------------------------------------------------------------------------------------|
| <b>Penaeidae sp.</b>                       | <i>P. monodon</i> 5   | Pmon03a                     | 16S rDNA (long)                                                                             | Penaeus monodon (MF563558)                                                                                  | 100% (519 nt/519 nt)                                                                                                                   |
|                                            | <i>P. monodon</i> 6   | Pmon03b                     | 16S rDNA (long)                                                                             | Penaeus monodon (MF563557)                                                                                  | 100% (519 nt/519 nt)                                                                                                                   |
|                                            | <i>P. monodon</i> 7   | Pmon04a                     | 16S rDNA (long)                                                                             | Penaeus monodon (MF563558)                                                                                  | 100% (519 nt/519 nt)                                                                                                                   |
|                                            | <i>P. monodon</i> 8   | Pmon04b                     | 16S rDNA (long)                                                                             | Penaeus monodon (MF563558)                                                                                  | 99.81% (518 nt/519 nt)                                                                                                                 |
|                                            | Penaeidae sp. 1       | Pnotial01a                  | 16S rDNA (short)                                                                            | Heika japonica (AY452770)/<br>Penaeus duorarum (MG001106)                                                   | 98.44% (63 nt/64 nt)/<br>97.43% (265 nt/272 nt)                                                                                        |
|                                            | Penaeidae sp. 2       | Pnotial01b                  | 16S rDNA (short)                                                                            | Heika japonica (AY452770)/<br>Penaeus duorarum (MG001106)                                                   | 98.44% (63 nt/64 nt)/<br>97.43% (265 nt/272 nt)                                                                                        |
|                                            |                       |                             |                                                                                             | COI GenBank<br>Farfantepenaeus notialis (MF287098)/<br>Penaeus notialis (X84350)                            | 97.07% (597 nt/615 nt)/<br>95.59% (628 nt/657 nt)                                                                                      |
| <b>Penaeus (Fenneropenaeus) indicus</b>    |                       |                             | COI BOLD<br>Farfantepenaeus notialis                                                        | 97.06%                                                                                                      |                                                                                                                                        |
|                                            | Penaeidae sp. 3       | Pnotial01c                  | 16S rDNA (short)                                                                            | Heika japonica (AY452770)/<br>Penaeus duorarum (MG001106)                                                   | 98.44% (63 nt/64 nt)/<br>97.43% (265 nt/272 nt)                                                                                        |
|                                            | <i>P. indicus</i> 1   | Pindic01                    | 16S rDNA (short)                                                                            | Fenneropenaeus indicus (MH094390)                                                                           | 100% (272 nt/272 nt)                                                                                                                   |
|                                            |                       |                             | COI GenBank<br>Fenneropenaeus indicus (KC409393)                                            | 100% (637 nt/637 nt)                                                                                        |                                                                                                                                        |
|                                            |                       |                             | COI BOLD<br>Fenneropenaeus indicus                                                          | 100%                                                                                                        |                                                                                                                                        |
|                                            | <i>P. indicus</i> 2   | Penaeid03a                  | 16S rDNA (long)                                                                             | Fenneropenaeus indicus (KX462904)                                                                           | 100% (519 nt/519 nt)                                                                                                                   |
|                                            |                       |                             | COI GenBank<br>Fenneropenaeus indicus (KP970376)                                            | 99.66% (587 nt/589 nt)/<br>99.54 (655 nt/658 nt)                                                            |                                                                                                                                        |
| <b>Penaeus (Fenneropenaeus) merguensis</b> |                       |                             | COI BOLD<br>Fenneropenaeus indicus                                                          | 99.83%                                                                                                      |                                                                                                                                        |
|                                            | <i>P. merguensis</i>  | Penaeid03d                  | 16S rDNA (long)                                                                             | Fenneropenaeus merguensis (KP637168)                                                                        | 100% (510 nt/510 nt)/<br>99.42% (516 nt/519 nt)                                                                                        |
|                                            |                       |                             | COI GenBank<br>Penaeus indicus (AF284431) +<br>Fenneropenaeus merguensis (KC409384)         | 99.39% (654 nt/658 nt) +<br>99.69% (646 nt/648 nt)                                                          |                                                                                                                                        |
| <b>Parapenaeopsis stylifera</b>            |                       |                             | COI BOLD<br>Fenneropenaeus merguensis                                                       | 99.83%                                                                                                      |                                                                                                                                        |
|                                            | <i>P. stylifera</i> 1 | Penaeid01a                  | 16S rDNA (long)                                                                             | Parapenaeopsis stylifera (MH045067)                                                                         | 99.4% (495 nt/498 nt)                                                                                                                  |
|                                            |                       |                             | COI GenBank<br>Parapenaeopsis stylifera (KY316145)/<br><i>P. aff. sculptilis</i> (KX399432) | 100% (573 nt/573 nt)/<br>99.84% (623 nt/624 nt)                                                             |                                                                                                                                        |
|                                            |                       |                             | COI BOLD<br>Parapenaeopsis stylifera                                                        | 100%                                                                                                        |                                                                                                                                        |
|                                            | <i>P. stylifera</i> 2 | Penaeid01e                  | 16S rDNA (long)                                                                             | Parapenaeopsis stylifera (MH045067)                                                                         | 99.8% (497 nt/498 nt)                                                                                                                  |
|                                            |                       |                             | COI GenBank<br>Parapenaeopsis stylifera (KY316145)/<br><i>P. aff. sculptilis</i> (KX399432) | 100% (573 nt/573 nt)/<br>99.84% (623 nt/624 nt)                                                             |                                                                                                                                        |
| <b>Xiphopenaeus kroyeri</b>                |                       |                             | COI BOLD<br>Parapenaeopsis stylifera                                                        | 100%                                                                                                        |                                                                                                                                        |
|                                            | <i>X. kroyeri</i>     | Xkroy01                     | 16S rDNA (short)                                                                            | Xiphopenaeus kroyeri (KY449069)                                                                             | 100% (272 nt/272 nt)                                                                                                                   |
|                                            |                       |                             | COI GenBank<br>Xiphopenaeus kroyeri (MH300662)/<br><i>X. kroyeri</i> (KX196599)             | 100% (473 nt/473 nt)/<br>99.5% (602 nt/605 nt)                                                              |                                                                                                                                        |

|                                        |                          |                             | COI BOLD                        | Xiphopenaeus kroyery                                                                                        | 99.81%                                                                                                                                 |
|----------------------------------------|--------------------------|-----------------------------|---------------------------------|-------------------------------------------------------------------------------------------------------------|----------------------------------------------------------------------------------------------------------------------------------------|
| <i>continued</i>                       |                          |                             |                                 |                                                                                                             |                                                                                                                                        |
| Species                                | Specimen                 | Original sample designation | Gene marker (and database)      | First GenBank hit (sorted by Maximum Percent Identity/sorted by Maximum Score) <sup>a</sup> /First BOLD hit | GenBank identity of first hit (sorted by Maximum Percent Identity/sorted by Maximum Score) <sup>a</sup> / BOLD similarity of first hit |
| <b><i>Metapenaeus dobsoni</i></b>      | <i>M. dobsoni</i> 1      | Mdobs01                     | 16S rDNA (long)                 | Metapenaeus tenuipes (MF581793)                                                                             | 95.39% (497 nt/521 nt)                                                                                                                 |
|                                        |                          |                             | COI GenBank                     | Metapenaeus dobsoni (KF453214)/<br>M. dobsoni (KJ879280)                                                    | 100% (598 nt/958 nt)/<br>99.39% (654 nt/658 nt)                                                                                        |
|                                        |                          |                             | COI BOLD                        | Metapenaeus dobsoni                                                                                         | 100%                                                                                                                                   |
|                                        | <i>M. dobsoni</i> 2      | Penaeid01c                  | 16S rDNA (long)                 | Metapenaeus tenuipes (MF581793)                                                                             | 95.39% (497 nt/521 nt)                                                                                                                 |
|                                        | <i>M. dobsoni</i> 3      | Penaeid02b                  | 16S rDNA (long)                 | Metapenaeus tenuipes (MF581793)                                                                             | 96.78% (499 nt/521 nt)                                                                                                                 |
| <i>M. dobsoni</i> 4                    | Penaeid02a               | 16S rDNA (long)             | Metapenaeus tenuipes (MF581793) | 96.78% (499/521)                                                                                            |                                                                                                                                        |
|                                        |                          |                             | COI GenBank                     | Metapenaeus dobsoni (KM508833)                                                                              | 99.85% (657 nt/658 nt)                                                                                                                 |
|                                        |                          |                             | COI BOLD                        | Metapenaeus dobsoni                                                                                         | 99.85                                                                                                                                  |
| <b><i>Metapenaeus sp.</i></b>          | <i>Metapenaeus sp.</i> 1 | Penaeid01d                  | 16S rDNA (long)                 | Metapenaeus affinis (MK511443)/<br>M. affinis (NC_039179)                                                   | 100% (455 nt/455 nt)/<br>99.81% (518 nt/519 nt)                                                                                        |
|                                        |                          |                             | COI GenBank                     | Metapenaeus monoceros (MK986635)/<br>M.affinis (NC_039179)                                                  | 99.82% (566 nt/567 nt)/<br>98.18% (646 nt/658 nt)                                                                                      |
|                                        |                          |                             | COI BOLD                        | Metapenaeus affinis                                                                                         | 98.17%                                                                                                                                 |
|                                        | <i>Metapenaeus sp.</i> 2 | Penaeid01b                  | 16S rDNA (long)                 | Metapenaeus affinis (MK511443)/<br>M. affinis (NC_039179)                                                   | 100% (455 nt/455 nt)/<br>99.81% (518 nt/519 nt)                                                                                        |
| <b>Solenoceridae</b>                   |                          |                             |                                 |                                                                                                             |                                                                                                                                        |
| <b><i>Pleoticus muelleri</i></b>       |                          |                             |                                 |                                                                                                             |                                                                                                                                        |
|                                        | <i>P. muelleri</i> 1     | Pmuel02a                    | 16S rDNA (long)                 | Pleoticus muelleri (MF490231)                                                                               | 99.81% (514 nt/515 nt)                                                                                                                 |
|                                        | <i>P. muelleri</i> 2     | Pmuel02b                    | 16S rDNA (short)                | Pleoticus muelleri (MH300634)                                                                               | 100% (270 nt/270 nt)                                                                                                                   |
|                                        |                          |                             | COI GenBank                     | Pleoticus muelleri (NC_039964)                                                                              | 100% (658 nt/658 nt)                                                                                                                   |
|                                        |                          |                             | COI BOLD                        | Pleoticus muelleri                                                                                          | 100%                                                                                                                                   |
|                                        | <i>P. muelleri</i> 3     | Pmuel02c                    | 16S rDNA (short)                | Pleoticus muelleri (MH300634)                                                                               | 100% (270 nt/270 nt)                                                                                                                   |
| <b>Aristaeidae</b>                     |                          |                             |                                 |                                                                                                             |                                                                                                                                        |
| <b><i>Aristaeopsis edwardsiana</i></b> |                          |                             |                                 |                                                                                                             |                                                                                                                                        |
|                                        | <i>A. edwardsiana</i> 1  | Aedwards01a                 | 16S rDNA (short)                | Aristaeopsis edwardsiana (JX403854)                                                                         | 98.89% (268 nt/271 nt)                                                                                                                 |
|                                        |                          |                             | COI GenBank                     | Aristeomorpha foliacea (NC_039153)                                                                          | 84.91% (557 nt/656 nt)                                                                                                                 |
|                                        |                          |                             | COI BOLD                        | Aristaeopsis edwardsiana                                                                                    | 99.68%                                                                                                                                 |
|                                        | <i>A. edwardsiana</i> 2  | Aedwards01b                 | 16S rDNA (short)                | Aristaeopsis edwardsiana (JX403854)                                                                         | 98.52% (267 nt/271 nt)                                                                                                                 |
|                                        |                          |                             | COI GenBank                     | Aristeomorpha foliacea (NC_039153)                                                                          | 85.06% (558 nt/656 nt)                                                                                                                 |
|                                        |                          |                             | COI BOLD                        | Aristaeopsis edwardsiana                                                                                    | 99.45%                                                                                                                                 |
|                                        | <i>A. edwardsiana</i> 3  | Aedwards01c                 | 16S rDNA (short)                | Aristaeopsis edwardsiana (JX403854)                                                                         | 99.26% (269 nt/271 nt)                                                                                                                 |
| <b>Crangonidae</b>                     |                          |                             |                                 |                                                                                                             |                                                                                                                                        |
| <b><i>Crangon crangon</i></b>          |                          |                             |                                 |                                                                                                             |                                                                                                                                        |
|                                        | <i>C. crangon</i> 1      | Ccran01a                    | 16S rDNA (long)                 | Crangon crangon (KT952496)                                                                                  | 100% (464 nt/464 nt)                                                                                                                   |
|                                        |                          |                             | COI GenBank                     | Crangon crangon (KT208904)                                                                                  | 100% (650 nt/650 nt)                                                                                                                   |
|                                        |                          |                             | COI BOLD                        | Crangon crangon                                                                                             | 100%                                                                                                                                   |
|                                        | <i>C. crangon</i> 2      | Ccran01b                    | 16S rDNA (long)                 | C. crangon (KT952496)                                                                                       | 100% (464 nt/464 nt)                                                                                                                   |

continued

| Species                                          | Specimen                       | Original sample designation | Gene marker (and database) | First GenBank hit (sorted by Maximum Percent Identity/sorted by Maximum Score) <sup>a</sup> /First BOLD hit | GenBank identity of first hit (sorted by Maximum Percent Identity/sorted by Maximum Score) <sup>a</sup> / BOLD similarity of first hit |
|--------------------------------------------------|--------------------------------|-----------------------------|----------------------------|-------------------------------------------------------------------------------------------------------------|----------------------------------------------------------------------------------------------------------------------------------------|
| <b>Pandalidae</b>                                |                                |                             |                            |                                                                                                             |                                                                                                                                        |
| <b><i>Heterocarpus sp.</i></b>                   | <i>Heterocarpus sp. 1</i>      | Hreed01a                    | 16S rDNA (long)            | Heterocarpus sp. (MH300626)/<br>Heterocarpus sp. (MH300640)                                                 | 100% (243 nt/243 nt)/<br>99.79% (479 nt/480 nt)                                                                                        |
|                                                  |                                |                             | COI GenBank<br>COI BOLD    | Heterocarpus sp. (MH300659)<br>Heterocarpus sp.                                                             | 100% (477 nt/477 nt)<br>100%                                                                                                           |
|                                                  | <i>Heterocarpus sp. 2</i>      | Hreed01b                    | 16S rDNA (long)            | Heterocarpus sp. (MH300640)                                                                                 | 99.79% (479 nt/480 nt)                                                                                                                 |
| <b><i>Pandalus sp.</i></b>                       | <i>Pandalus sp. 1</i>          | Pbor01a                     | 16S rDNA (short)           | <i>Pandalus borealis</i> (MH300624) +<br><i>Pandalus eous</i> (LC121745)                                    | 100% (227 nt/227 nt)                                                                                                                   |
|                                                  |                                |                             | COI GenBank                | <i>Pandalus borealis</i> (KY018757)/<br><i>Pandalus borealis</i> (KY018893)                                 | 99.70% (656 nt/658 nt)/<br>100% (227 nt/227 nt)                                                                                        |
|                                                  | <i>Pandalus sp. 2</i>          | Pbor01b                     | 16S rDNA (short)           | <i>Pandalus borealis</i> (MH300624) +<br><i>Pandalus eous</i> (LC121745)                                    | 100% (265 nt/265 nt)                                                                                                                   |
|                                                  | <i>Pandalus sp. 3</i>          | Pbor01c                     | COI BOLD                   | <i>Pandalus borealis</i> + <i>Pandalus eous</i>                                                             | 99.85% + 99.84%                                                                                                                        |
|                                                  |                                |                             | 16S rDNA (short)           | <i>Pandalus borealis</i> (MH300624) +<br><i>Pandalus eous</i> (LC121745)                                    | 100% (265 nt/265 nt)                                                                                                                   |
| <b>Palaemonidae</b>                              |                                |                             |                            |                                                                                                             |                                                                                                                                        |
| <b><i>Macrobrachium rosenbergii dacqueti</i></b> | <i>M. rosenbergii dacqueti</i> | Mrosenb01                   | 16S rDNA (short)           | <i>Macrobrachium rosenbergii</i> (MF402019)                                                                 | 100% (255 nt/255 nt)                                                                                                                   |
|                                                  |                                |                             | COI GenBank                | <i>Macrobrachium rosenbergii</i> (AY554326)/<br><i>M. rosenbergii</i> (MF563572)                            | 100% (593 nt/593 nt)/<br>99.85% (657 nt/658 nt)                                                                                        |
|                                                  |                                |                             | COI BOLD                   | <i>Macrobrachium rosenbergii</i>                                                                            | 100%                                                                                                                                   |
| <b>Cambaridae</b>                                |                                |                             |                            |                                                                                                             |                                                                                                                                        |
| <b><i>Procambarus clarkii</i></b>                | <i>P. clarkii 1</i>            | Pclar01a                    | 16S rDNA (short)           | <i>Procambarus clarkii</i> (MH300651)                                                                       | 99.61% (257 nt/258 nt)                                                                                                                 |
|                                                  |                                |                             | COI GenBank                | <i>Procambarus clarkii</i> (MF170536)                                                                       | 100% (582 nt/582 nt)                                                                                                                   |
|                                                  |                                |                             | COI BOLD                   | <i>Procambarus clarkii</i>                                                                                  | 100%                                                                                                                                   |
|                                                  | <i>P. clarkii 2</i>            | Pclar01c                    | 16S rDNA (short)           | <i>Procambarus clarkii</i> (KJ645830)                                                                       | 100% (265 nt/265 nt)                                                                                                                   |

<sup>a</sup>) If query coverage was < 100%, the first hit sorted by Maximum Score is also displayed in addition of the first hit sorted by Maximum Percent Identity.
